# Supplementary material for: Double cohesion in structural DNA nanotechnology
Source: Royal Society of Chemistry journal article supplement (doi:10.1039/b605212f), 2006-01-01

### **Supplementary Data**

The sequences of the  $(8+4) \times (8+4)$  DX Parallelogram, the 3D-DX triangle, the Six-Helix bundle and the skewed TX triangle are shown in schematic form.

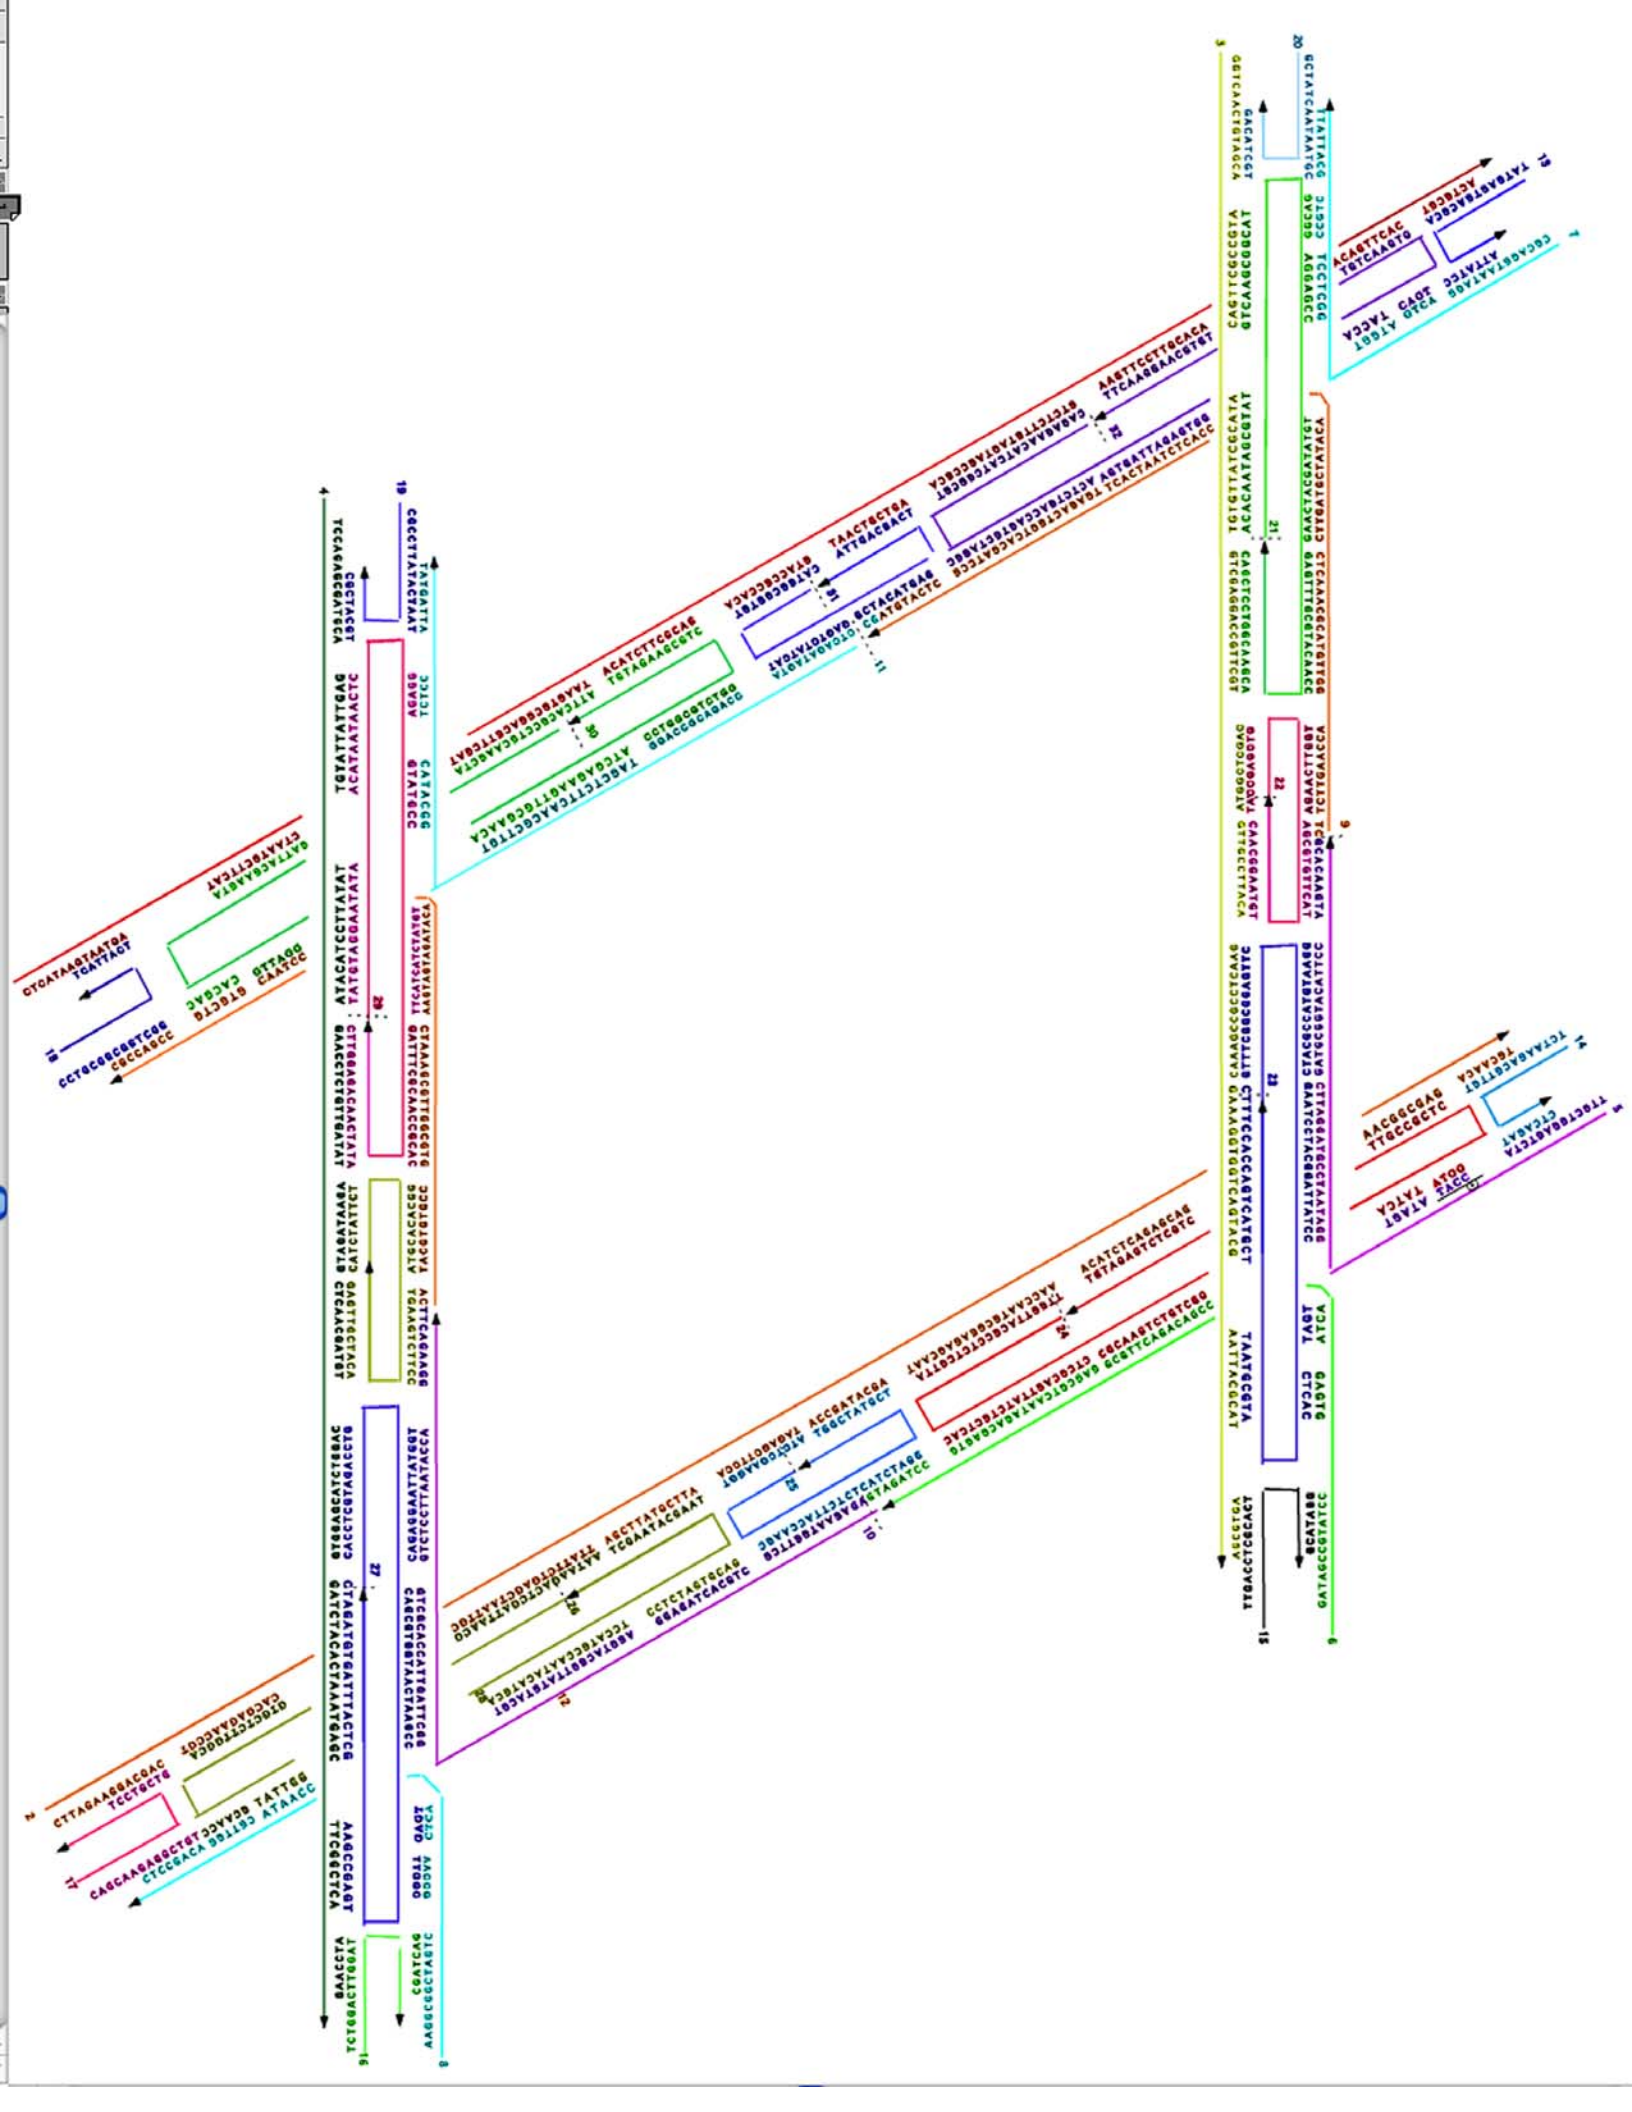

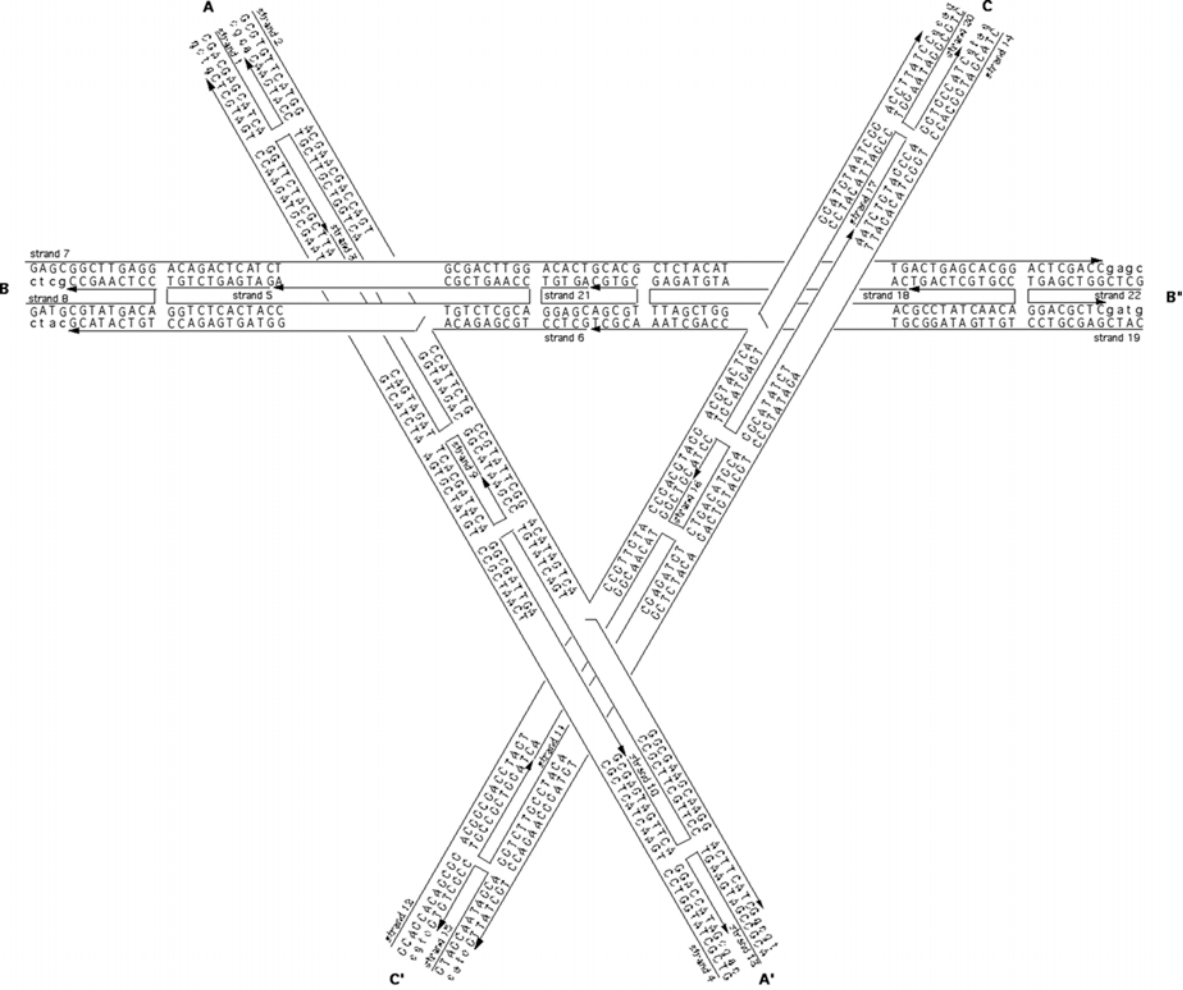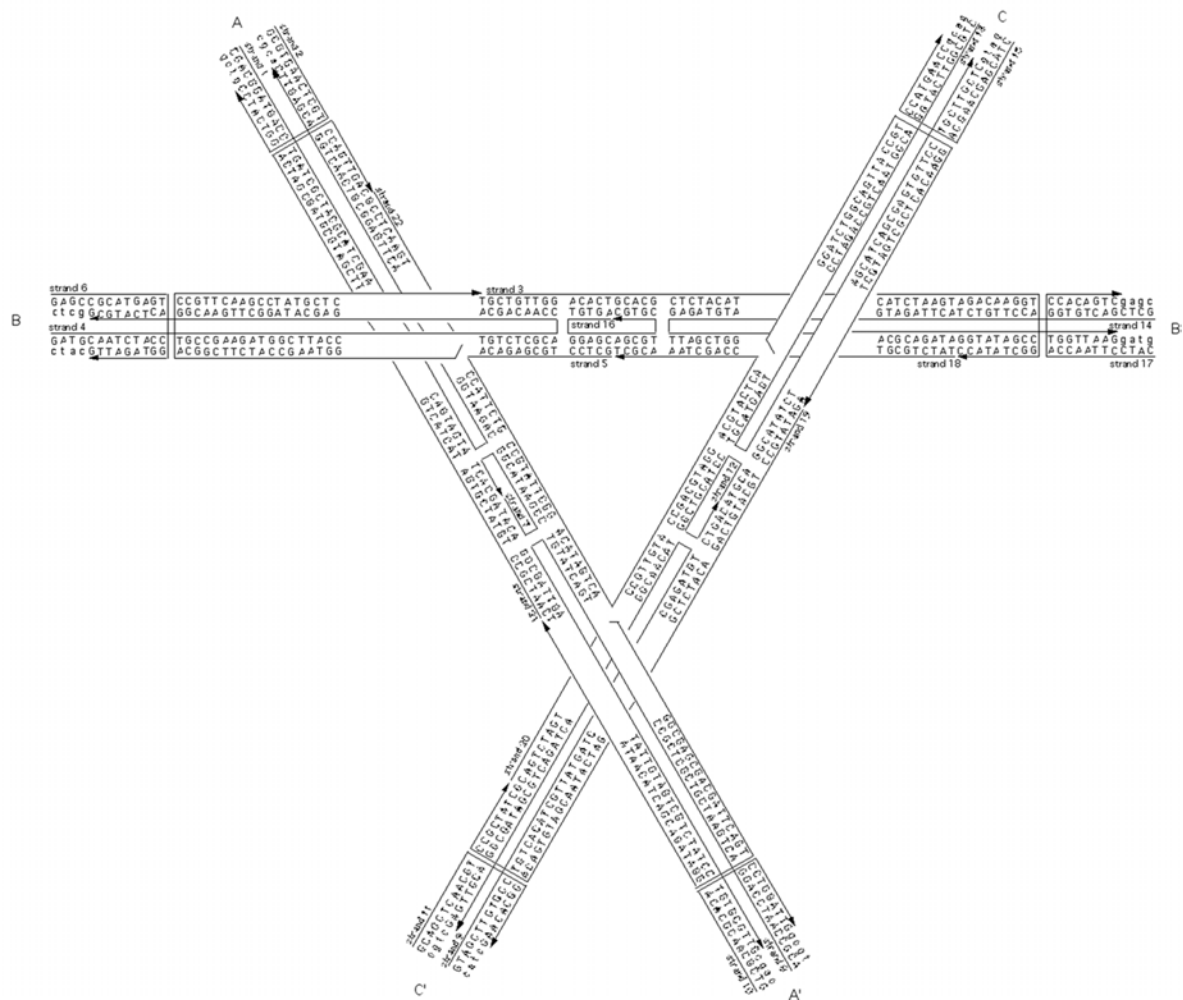

## Tile - 1

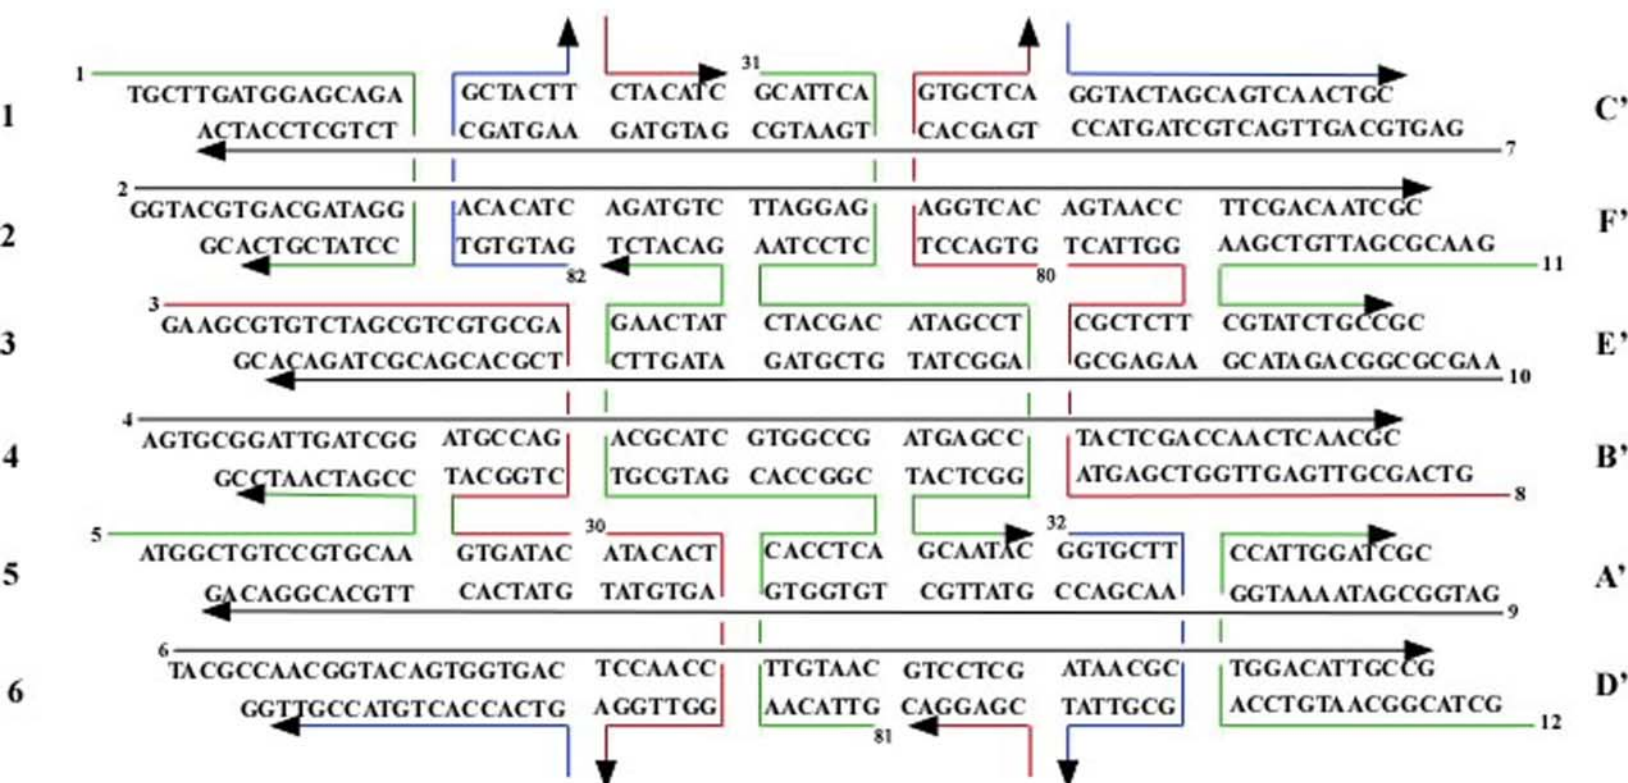

## Tile - 2

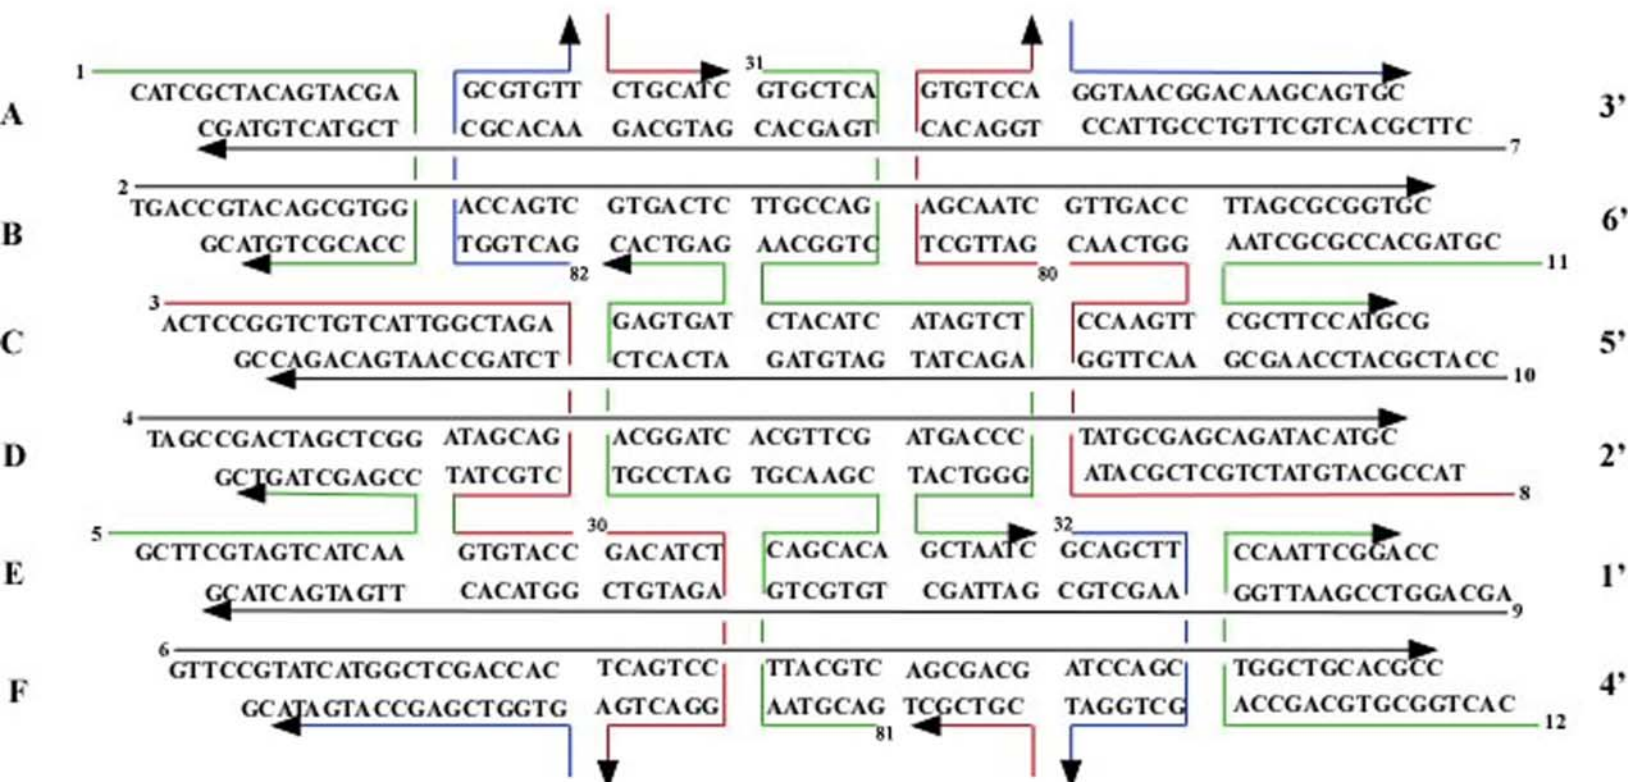



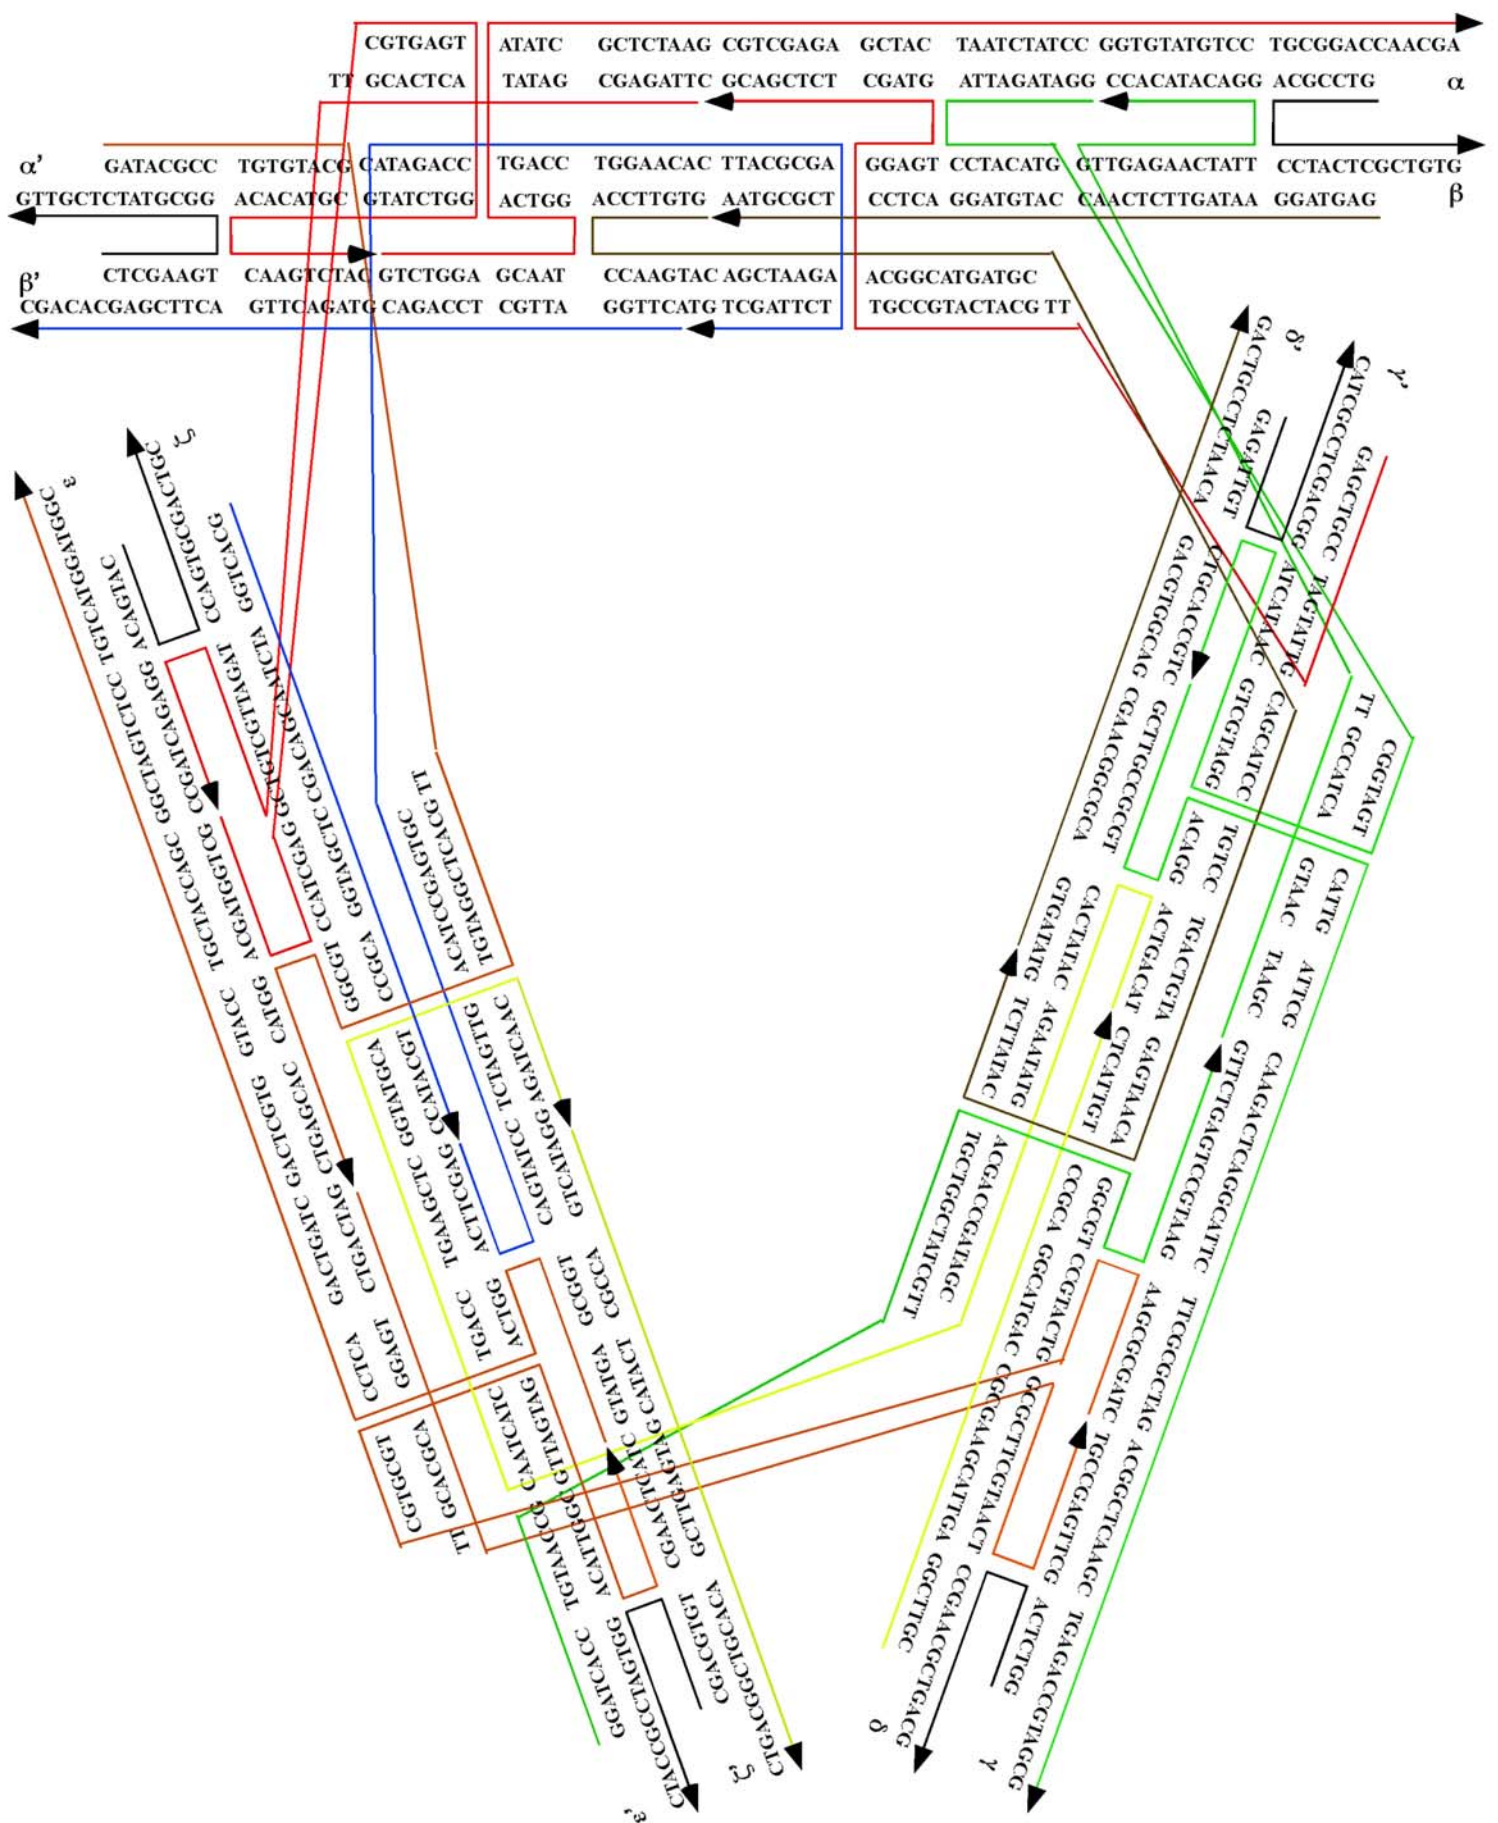

Supplement: b605212f.pdf [file b605212f.pdf]
